# Supplementary material for: The AGT Epistasis Pattern Proposed a Novel Role for ZBED9 In Regulating Blood Pressure: Tehran Cardiometabolic Genetic Study (TCGS)
Source: Research Square preprint supplement (doi:10.21203/rs.3.rs-1216294/v1), 2022-01-11
Supplement: Supplementary file 1 [file b2f70b927eaf8d145fced253.xlsx]

## Sheet: HTN
Interaction	Effect Type	SNP1	SNP2	SNP3	SNP4	Geno 1	Geno 2	Geno 3	Geno 4	Effect Size	Wald statsitic	P-value	adj. P-value
G-G ZBED9 & AGT	Antagonistic	rs450630_1	rs4762_1			GA	GA	-	-	0.668532	25.1451	5.31751e-07	2.92463e-05
G-G TNXB & ZBED9	Antagonistic	rs2269429_4	rs450630_1			CT	GA	-	-	0.710498	20.8958	4.84947e-06	0.000266721
G-G ZBED9 & AGT	Antagonistic	rs450630_1	rs11122576_2			GA	CC	-	-	0.719394	19.695	9.08392e-06	0.000499616
G-G TNXB & ZBED9	Antagonistic	rs12153855_2	rs450630_1			CT	GA	-	-	0.710882	19.6372	9.36307e-06	0.000514969
SNP-SNP ZBED9	Antagonistic	rs16901848_1	rs450630_1			AA	GA	-	-	0.724478	18.5227	1.67892e-05	0.000923406
G-G ZBED9 & AGT	Antagonistic	rs450630_1	rs2004776_4			GA	CT	-	-	0.733262	17.2261	3.31852e-05	0.00182519
G-G ZBED9 & AGT	Antagonistic	rs450630_1	rs2493134_4			GA	CT	-	-	0.706239	14.9302	0.000111561	0.00613584
G-G all	Antagonistic	rs2021783_4	rs450630_1	rs4762_1		CT	AA	GA	-	0.661121	26.0939	3.25211e-07	5.36599e-05
G-G all	Antagonistic	rs12153855_2	rs450630_1	rs4762_1		CT	GA	GA	-	0.664461	25.76	3.86612e-07	6.3791e-05
G-G ZBED9 & AGT	Antagonistic	rs450630_1	rs2493134_4	rs4762_1		GA	CT	GA	-	0.667229	25.3856	4.69405e-07	7.74519e-05
G-G ZBED9 & AGT	Antagonistic	rs450630_1	rs449074_2	rs4762_1		GA	CC	GA	-	0.663445	25.2522	5.03025e-07	8.29991e-05
G-G all	Antagonistic	rs2269429_4	rs450630_1	rs4762_1		CT	GA	GA	-	0.669087	24.2804	8.32803e-07	0.000137412
G-G ZBED9 & AGT	Antagonistic	rs16901848_1	rs450630_1	rs4762_1		AA	GA	AA	-	0.679806	22.6757	1.9178e-06	0.000316437
G-G ZBED9 & AGT	Antagonistic	rs450630_1	rs2004776_4	rs4762_1		GA	CT	GA	-	0.681519	21.6672	3.24295e-06	0.000535086
G-G TNXB & ZBED9	Antagonistic	rs2021783_4	rs2269429_4	rs450630_1		CT	CT	GA	-	0.706076	21.418	3.69288e-06	0.000609326
G-G TNXB & ZBED9	Antagonistic	rs12153855_2	rs2021783_4	rs450630_1		CT	CT	GA	-	0.704854	20.2742	6.70996e-06	0.00110714
G-G all	Antagonistic	rs2021783_4	rs450630_1	rs11122576_2		CT	GA	TC	-	0.716335	20.0162	7.67898e-06	0.00126703
G-G all	Antagonistic	rs2239689_1	rs450630_1	rs4762_1		AA	GA	AA	-	0.687766	19.7385	8.87939e-06	0.0014651
G-G TNXB & ZBED9	Antagonistic	rs12153855_2	rs2239689_1	rs450630_1		CT	AA	GA	-	0.710882	19.6372	9.36307e-06	0.00154491
G-G TNXB & ZBED9	Antagonistic	rs2239689_1	rs450630_1	rs449074_2		AA	GA	CC	-	0.720578	19.2591	1.14126e-05	0.00188308
G-G ZBED9 & AGT	Antagonistic	rs450630_1	rs11122576_2	rs4762_1		GA	CC	GA	-	0.691845	18.8934	1.38233e-05	0.00228084
G-G all	Antagonistic	rs12153855_2	rs450630_1	rs11122576_2		CT	GA	TC	-	0.716248	18.7157	1.51725e-05	0.00250347
G-G TNXB & ZBED9	Antagonistic	rs2021783_4	rs16901848_1	rs450630_1		CT	GA	GA	-	0.724614	18.3409	1.84698e-05	0.00304751
G-G TNXB & ZBED9	Antagonistic	rs12153855_2	rs16901848_1	rs450630_1		CT	AA	GA	-	0.72028	17.8341	2.41029e-05	0.00397699
G-G all	Antagonistic	rs2021783_4	rs450630_1	rs2004776_4		CT	GA	CT	-	0.732955	17.0883	3.56812e-05	0.00588739
G-G all	Antagonistic	rs2021783_4	rs450630_1	rs2493134_4		CT	AA	CT	-	0.685897	17.0458	3.64888e-05	0.00602065
SNP-SNP ZBED9	Antagonistic	rs16901848_1	rs450630_1	rs449074_2		AA	GA	CC	-	0.732634	17.0143	3.71002e-05	0.00612153
G-G all	Antagonistic	rs2239689_1	rs450630_1	rs2004776_4		AA	GA	TT	-	0.597654	16.3992	5.13072e-05	0.00846569
G-G all	Antagonistic	rs12153855_2	rs450630_1	rs2493134_4		CT	GA	CT	-	0.674599	16.1832	5.75018e-05	0.0094878
G-G TNXB & ZBED9	Antagonistic	rs12153855_2	rs2269429_4	rs450630_1		CT	CT	GA	-	0.690485	16.1174	5.95333e-05	0.00982299
G-G all	Antagonistic	rs12153855_2	rs450630_1	rs2004776_4		CT	GA	CT	-	0.734129	15.6974	7.43246e-05	0.0122636
G-G TNXB & ZBED9	Antagonistic	rs2269429_4	rs16901848_1	rs450630_1		CT	AA	GA	-	0.68136	15.6771	7.51268e-05	0.0123959
G-G ZBED9 & AGT	Antagonistic	rs16901848_1	rs450630_1	rs11122576_2		AA	GA	CC	-	0.742238	15.4859	8.31245e-05	0.0137155
G-G ZBED9 & AGT	Antagonistic	rs450630_1	rs449074_2	rs2004776_4		GA	CC	CT	-	0.74449	15.3256	9.04817e-05	0.0149295
G-G TNXB & ZBED9	Antagonistic	rs2239689_1	rs2269429_4	rs450630_1		AA	CT	AA	-	0.703737	14.7765	0.000121037	0.0199711
G-G ZBED9 & AGT	Antagonistic	rs16901848_1	rs450630_1	rs2004776_4		AA	GA	TT	-	0.693984	14.4629	0.000142947	0.0235862
G-G ZBED9 & AGT	Antagonistic	rs450630_1	rs449074_2	rs2493134_4		GA	CC	CT	-	0.707803	14.2215	0.000162503	0.0268131
G-G all	Antagonistic	rs2269429_4	rs450630_1	rs2493134_4		CT	GA	CT	-	0.6815	13.9576	0.000186984	0.0308523
G-G ZBED9 & AGT	Antagonistic	rs16901848_1	rs450630_1	rs2493134_4		AA	GA	TT	-	0.624337	13.4787	0.000241284	0.0398119
G-G all	Antagonistic	rs2021783_4	rs450630_1	rs2493134_4	rs4762_1	CT	AA	CT	GA	0.659841	26.335	2.87042e-07	9.47238e-05
G-G all	Antagonistic	rs2021783_4	rs450630_1	rs449074_2	rs4762_1	CT	GA	TC	GA	0.655477	26.2489	3.00129e-07	9.90425e-05
G-G all	Antagonistic	rs2021783_4	rs2239689_1	rs450630_1	rs4762_1	CT	GA	GA	GA	0.661121	26.0939	3.25211e-07	0.00010732
G-G ZBED9 & AGT	Antagonistic	rs450630_1	rs449074_2	rs2493134_4	rs4762_1	GA	CC	CT	GA	0.66218	25.4842	4.46031e-07	0.00014719
G-G all	Antagonistic	rs2021783_4	rs2269429_4	rs450630_1	rs4762_1	CT	CT	GA	GA	0.661159	25.2512	5.03283e-07	0.000166084
G-G all	Antagonistic	rs2021783_4	rs450630_1	rs11122576_2	rs4762_1	CT	GA	TC	GA	0.666704	24.9161	5.98803e-07	0.000197605
G-G all	Antagonistic	rs2269429_4	rs450630_1	rs449074_2	rs4762_1	CT	GA	TC	GA	0.663275	24.431	7.70187e-07	0.000254162
G-G all	Antagonistic	rs12153855_2	rs2269429_4	rs450630_1	rs4762_1	CT	CT	GA	GA	0.659778	23.8117	1.06234e-06	0.000350573
G-G all	Antagonistic	rs2021783_4	rs16901848_1	rs450630_1	rs4762_1	CT	GA	GA	GA	0.672248	23.585	1.19518e-06	0.000394408
G-G ZBED9 & AGT	Antagonistic	rs16901848_1	rs450630_1	rs449074_2	rs4762_1	AA	GA	CC	AA	0.674784	22.7732	1.82293e-06	0.000601566
G-G all	Antagonistic	rs2239689_1	rs450630_1	rs2004776_4	rs4762_1	AA	GA	TT	AA	0.597622	22.5514	2.04594e-06	0.000675159
G-G all	Antagonistic	rs2021783_4	rs450630_1	rs2004776_4	rs4762_1	CT	GA	CT	GA	0.676962	22.0288	2.68594e-06	0.000886361
G-G all	Antagonistic	rs2239689_1	rs450630_1	rs449074_2	rs4762_1	AA	GA	CC	AA	0.670751	21.5265	3.48972e-06	0.00115161
G-G all	Antagonistic	rs12153855_2	rs16901848_1	rs450630_1	rs4762_1	CT	AA	GA	GA	0.672612	21.4741	3.58647e-06	0.00118354
G-G all	Antagonistic	rs12153855_2	rs2021783_4	rs450630_1	rs4762_1	CT	CT	GA	GA	0.671549	21.2606	4.00887e-06	0.00132293
G-G all	Antagonistic	rs12153855_2	rs450630_1	rs2004776_4	rs4762_1	CT	GA	CT	GA	0.674826	21.2021	4.13303e-06	0.0013639
G-G ZBED9 & AGT	Antagonistic	rs450630_1	rs449074_2	rs2004776_4	rs4762_1	GA	CC	CT	GA	0.680149	21.1611	4.2225e-06	0.00139343
G-G TNXB & ZBED9	Antagonistic	rs12153855_2	rs2021783_4	rs2239689_1	rs450630_1	CT	CT	GA	GA	0.704854	20.2742	6.70996e-06	0.00221429
G-G all	Antagonistic	rs12153855_2	rs2021783_4	rs450630_1	rs2004776_4	CT	CT	GA	CT	0.705398	20.183	7.03773e-06	0.00232245
G-G all	Antagonistic	rs12153855_2	rs16901848_1	rs450630_1	rs2493134_4	CT	AA	GA	CT	0.51874	19.9971	7.75616e-06	0.00255953
G-G TNXB & ZBED9	Antagonistic	rs2021783_4	rs2239689_1	rs450630_1	rs449074_2	CT	GA	GA	TC	0.716263	19.7525	8.81465e-06	0.00290884
G-G all	Antagonistic	rs2021783_4	rs450630_1	rs449074_2	rs2004776_4	CT	GA	TC	CT	0.716743	19.6717	9.19509e-06	0.00303438
G-G all	Antagonistic	rs12153855_2	rs2021783_4	rs450630_1	rs11122576_2	CT	CT	GA	TC	0.710135	19.3455	1.09078e-05	0.00359956
G-G all	Antagonistic	rs12153855_2	rs450630_1	rs11122576_2	rs4762_1	CT	GA	TC	GA	0.68697	19.2363	1.15495e-05	0.00381133
G-G ZBED9 & AGT	Antagonistic	rs450630_1	rs2493134_4	rs2004776_4	rs4762_1	GA	CT	CT	GA	0.677398	19.2117	1.16995e-05	0.00386085
G-G ZBED9 & AGT	Antagonistic	rs450630_1	rs449074_2	rs11122576_2	rs4762_1	GA	CC	TC	GA	0.686651	18.9179	1.36465e-05	0.00450336
G-G all	Antagonistic	rs2239689_1	rs450630_1	rs11122576_2	rs4762_1	AA	GA	CC	AA	0.691845	18.8934	1.38233e-05	0.00456168
G-G all	Antagonistic	rs12153855_2	rs2021783_4	rs450630_1	rs2493134_4	CT	CT	GA	CT	0.648924	18.7875	1.46122e-05	0.00482203
G-G all	Antagonistic	rs2269429_4	rs450630_1	rs2493134_4	rs4762_1	CT	GA	CT	GA	0.675638	18.7606	1.48196e-05	0.00489046
G-G all	Antagonistic	rs12153855_2	rs450630_1	rs449074_2	rs2004776_4	CT	GA	TC	CT	0.714629	18.5852	1.62478e-05	0.00536176
G-G all	Antagonistic	rs2239689_1	rs450630_1	rs2493134_4	rs4762_1	AA	GA	TT	AA	0.598907	18.5383	1.66521e-05	0.00549518
G-G all	Antagonistic	rs2239689_1	rs16901848_1	rs450630_1	rs4762_1	AA	AA	AA	AA	0.672617	18.4285	1.76404e-05	0.00582133
G-G all	Antagonistic	rs2021783_4	rs2269429_4	rs450630_1	rs11122576_2	CT	CT	GA	TC	0.72177	18.4128	1.77862e-05	0.00586943
G-G all	Antagonistic	rs12153855_2	rs16901848_1	rs450630_1	rs2004776_4	CT	AA	GA	CT	0.63476	18.3873	1.80253e-05	0.00594834
G-G all	Antagonistic	rs2269429_4	rs450630_1	rs11122576_2	rs4762_1	CT	GA	TC	GA	0.69322	18.0796	2.11858e-05	0.00699133
G-G all	Antagonistic	rs2269429_4	rs450630_1	rs2004776_4	rs4762_1	CT	GA	CT	GA	0.684938	17.9881	2.22287e-05	0.00733547
G-G TNXB & ZBED9	Antagonistic	rs2239689_1	rs2269429_4	rs450630_1	rs449074_2	AA	CT	AA	CC	0.715473	17.9538	2.26332e-05	0.00746897
G-G ZBED9 & AGT	Antagonistic	rs16901848_1	rs450630_1	rs2493134_4	rs4762_1	AA	GA	TT	AA	0.589089	17.6992	2.58737e-05	0.00853831
G-G all	Antagonistic	rs2021783_4	rs450630_1	rs2493134_4	rs11122576_2	CT	AA	CT	TC	0.679614	17.6872	2.60371e-05	0.00859223
G-G all	Antagonistic	rs12153855_2	rs2239689_1	rs450630_1	rs2004776_4	CT	AA	GA	CT	0.634562	17.6125	2.708e-05	0.00893642
G-G ZBED9 & AGT	Antagonistic	rs16901848_1	rs450630_1	rs11122576_2	rs4762_1	AA	GA	CC	AA	0.699786	17.3947	3.03671e-05	0.0100211
G-G all	Antagonistic	rs12153855_2	rs450630_1	rs449074_2	rs11122576_2	CT	GA	TC	TC	0.7229	17.2927	3.20416e-05	0.0105737
G-G all	Antagonistic	rs12153855_2	rs450630_1	rs2493134_4	rs4762_1	CT	GA	CT	GA	0.62544	17.1474	3.45877e-05	0.0114139
G-G all	Antagonistic	rs2021783_4	rs2269429_4	rs450630_1	rs2493134_4	CT	CT	GA	CT	0.648701	17.0076	3.72308e-05	0.0122862
G-G ZBED9 & AGT	Antagonistic	rs450630_1	rs2493134_4	rs11122576_2	rs4762_1	GA	CT	TC	GA	0.634159	16.6425	4.51293e-05	0.0148927
G-G all	Antagonistic	rs2021783_4	rs450630_1	rs449074_2	rs2493134_4	CT	AA	TC	CT	0.686512	16.3352	5.30692e-05	0.0175128
G-G TNXB & ZBED9	Antagonistic	rs12153855_2	rs2021783_4	rs2269429_4	rs450630_1	CT	CT	CT	GA	0.685301	16.2885	5.43938e-05	0.01795
G-G all	Antagonistic	rs2269429_4	rs450630_1	rs2493134_4	rs11122576_2	CT	GA	CT	TC	0.657217	16.2876	5.44203e-05	0.0179587
G-G all	Antagonistic	rs12153855_2	rs2269429_4	rs450630_1	rs2493134_4	CT	CT	GA	CT	0.689354	16.2592	5.52404e-05	0.0182293
G-G all	Antagonistic	rs2239689_1	rs2269429_4	rs450630_1	rs4762_1	AA	CT	AA	AA	0.684668	16.1603	5.82006e-05	0.0192062
G-G TNXB & ZBED9	Antagonistic	rs12153855_2	rs2239689_1	rs2269429_4	rs450630_1	CT	AA	CT	GA	0.690485	16.1174	5.95333e-05	0.019646
G-G all	Antagonistic	rs12153855_2	rs450630_1	rs449074_2	rs2493134_4	CT	GA	TC	CT	0.670182	16.0355	6.2167e-05	0.0205151
G-G ZBED9 & AGT	Antagonistic	rs450630_1	rs2004776_4	rs11122576_2	rs4762_1	GA	CT	TC	GA	0.709504	15.8813	6.74411e-05	0.0222556
G-G TNXB & ZBED9	Antagonistic	rs12153855_2	rs2269429_4	rs450630_1	rs449074_2	CT	CT	GA	TC	0.687352	15.8157	6.98217e-05	0.0230412
G-G all	Antagonistic	rs12153855_2	rs2269429_4	rs450630_1	rs11122576_2	CT	CT	GA	TC	0.693369	15.6179	7.75188e-05	0.0255812
G-G all	Antagonistic	rs12153855_2	rs450630_1	rs2493134_4	rs11122576_2	CT	GA	CT	TC	0.6797	15.3964	8.71537e-05	0.0287607
G-G all	Antagonistic	rs2239689_1	rs16901848_1	rs450630_1	rs2493134_4	AA	AA	AA	TT	0.496649	15.3935	8.7286e-05	0.0288044
G-G all	Antagonistic	rs2269429_4	rs16901848_1	rs450630_1	rs2004776_4	CT	AA	GA	CT	0.616176	15.2106	9.61631e-05	0.0317338
G-G all	Antagonistic	rs2269429_4	rs16901848_1	rs450630_1	rs11122576_2	CT	AA	GA	TC	0.669733	15.1389	9.98819e-05	0.032961
G-G all	Antagonistic	rs2021783_4	rs2239689_1	rs450630_1	rs2004776_4	CT	GA	GA	CT	0.608038	15.1163	0.000101087	0.0333587
G-G all	Antagonistic	rs12153855_2	rs16901848_1	rs450630_1	rs11122576_2	CT	AA	GA	TC	0.681836	15.0014	0.000107434	0.0354532
G-G TNXB & ZBED9	Antagonistic	rs2239689_1	rs2269429_4	rs16901848_1	rs450630_1	AA	CT	AA	AA	0.593227	14.977	0.000108827	0.0359131
G-G all	Antagonistic	rs2021783_4	rs16901848_1	rs450630_1	rs2004776_4	CT	GA	GA	CT	0.685424	14.9554	0.000110085	0.0363282
G-G ZBED9 & AGT	Antagonistic	rs16901848_1	rs450630_1	rs2493134_4	rs11122576_2	AA	GA	TT	CC	0.582905	14.8017	0.000119428	0.0394113
G-G all	Antagonistic	rs12153855_2	rs450630_1	rs2004776_4	rs11122576_2	CT	GA	CT	TC	0.740684	14.7478	0.000122891	0.040554
G-G TNXB & ZBED9	Antagonistic	rs2269429_4	rs16901848_1	rs450630_1	rs449074_2	CT	AA	GA	TC	0.68594	14.7434	0.000123179	0.0406491
G-G all	Antagonistic	rs2021783_4	rs16901848_1	rs450630_1	rs2493134_4	CT	GA	GA	CT	0.60624	14.5842	0.000134032	0.0442306
G-G ZBED9 & AGT	Antagonistic	rs16901848_1	rs450630_1	rs449074_2	rs2493134_4	AA	GA	CC	TT	0.603789	14.4771	0.000141876	0.0468191
G-G TNXB & ZBED9	Antagonistic	rs2021783_4	rs2269429_4	rs16901848_1	rs450630_1	CT	CT	GA	GA	0.690159	14.475	0.000142034	0.0468713
G-G TNXB & ZBED9	Antagonistic	rs12153855_2	rs2269429_4	rs16901848_1	rs450630_1	CT	CT	GA	GA	0.594638	14.4581	0.000143314	0.0472937
G-G TNXB & ZBED9	synergistic	rs2021783_4	rs450630_1			CT	AA	-	-	1.42559	22.8882	1.71706e-06	9.44385e-05
SNP-SNP ZBED9	synergistic	rs450630_1	rs449074_2			AA	TC	-	-	1.414	21.9392	2.81425e-06	0.000154784
G-G TNXB & ZBED9	synergistic	rs2239689_1	rs450630_1			GA	AA	-	-	1.39143	17.0203	3.6982e-05	0.00203401
G-G TNXB & AGT	synergistic	rs12153855_2	rs4762_1			TT	AA	-	-	1.80841	13.2781	0.000268526	0.0147689
G-G TNXB & ZBED9	synergistic	rs2021783_4	rs450630_1	rs449074_2		CT	GA	TC	-	1.43719	24.0454	9.40903e-07	0.000155249
G-G TNXB & AGT	synergistic	rs12153855_2	rs2239689_1	rs4762_1		TT	GA	AA	-	2.81926	18.9526	1.34007e-05	0.00221111
G-G TNXB & ZBED9	synergistic	rs12153855_2	rs450630_1	rs449074_2		TT	AA	CC	-	1.37578	18.8118	1.44274e-05	0.00238052
G-G ZBED9 & AGT	synergistic	rs450630_1	rs449074_2	rs11122576_2		AA	TC	CC	-	1.37411	18.7082	1.52327e-05	0.0025134
G-G all	synergistic	rs2239689_1	rs450630_1	rs11122576_2		GA	AA	TC	-	1.42191	18.6941	1.53459e-05	0.00253207
G-G TNXB & ZBED9	synergistic	rs2269429_4	rs450630_1	rs449074_2		TT	AA	CC	-	1.36951	18.1934	1.99568e-05	0.00329287
G-G TNXB & ZBED9	synergistic	rs2021783_4	rs2239689_1	rs450630_1		CT	AA	GA	-	1.40169	17.6141	2.70574e-05	0.00446446
G-G all	synergistic	rs12153855_2	rs16901848_1	rs4762_1		TT	AA	AA	-	2.41237	16.7662	4.22808e-05	0.00697634
G-G TNXB & AGT	synergistic	rs12153855_2	rs2269429_4	rs4762_1		TT	TT	AA	-	2.29928	16.4368	5.02998e-05	0.00829946
G-G all	synergistic	rs2239689_1	rs450630_1	rs2493134_4		GA	AA	CT	-	1.44524	16.3829	5.17497e-05	0.0085387
G-G TNXB & AGT	synergistic	rs12153855_2	rs11122576_2	rs4762_1		TT	TC	AA	-	1.91541	15.4475	8.48288e-05	0.0139968
G-G TNXB & AGT	synergistic	rs12153855_2	rs2004776_4	rs4762_1		TT	TT	AA	-	1.82414	13.6304	0.000222557	0.0367219
G-G all	synergistic	rs2269429_4	rs450630_1	rs11122576_2		TT	AA	CC	-	1.33788	13.4247	0.000248328	0.0409741
G-G TNXB & AGT	synergistic	rs12153855_2	rs2021783_4	rs4762_1		TT	CT	AA	-	1.81034	13.3236	0.000262083	0.0432437
G-G all	synergistic	rs12153855_2	rs449074_2	rs4762_1		TT	TC	AA	-	1.80834	13.2748	0.000269004	0.0443857
G-G all	synergistic	rs12153855_2	rs2269429_4	rs16901848_1	rs4762_1	TT	TT	AA	AA	2.76522	31.9449	1.58605e-08	5.23396e-06
G-G all	synergistic	rs12153855_2	rs16901848_1	rs2004776_4	rs4762_1	TT	AA	TT	AA	3.00169	28.7427	8.26626e-08	2.72786e-05
G-G all	synergistic	rs12153855_2	rs2239689_1	rs450630_1	rs4762_1	TT	GA	AA	AA	1.64466	26.8701	2.17598e-07	7.18074e-05
G-G TNXB & AGT	synergistic	rs12153855_2	rs2269429_4	rs2493134_4	rs4762_1	TT	TT	TT	AA	2.36043	26.6427	2.44768e-07	8.07734e-05
G-G all	synergistic	rs12153855_2	rs16901848_1	rs11122576_2	rs4762_1	TT	AA	CC	AA	2.62083	23.9032	1.01303e-06	0.0003343
G-G all	synergistic	rs12153855_2	rs16901848_1	rs2493134_4	rs4762_1	TT	AA	TT	AA	2.91335	23.4312	1.29465e-06	0.000427235
G-G all	synergistic	rs12153855_2	rs450630_1	rs449074_2	rs4762_1	TT	AA	CC	AA	1.42584	22.403	2.21025e-06	0.000729381
G-G TNXB & AGT	synergistic	rs12153855_2	rs2239689_1	rs11122576_2	rs4762_1	TT	AA	CC	AA	2.64189	22.2036	2.4521e-06	0.000809193
G-G TNXB & AGT	synergistic	rs12153855_2	rs2269429_4	rs2004776_4	rs4762_1	TT	TT	TT	AA	2.46395	21.884	2.89636e-06	0.000955798
G-G all	synergistic	rs2239689_1	rs2269429_4	rs450630_1	rs2004776_4	GA	TT	GA	CT	1.68048	20.7781	5.15705e-06	0.00170183
G-G TNXB & ZBED9	synergistic	rs12153855_2	rs2021783_4	rs450630_1	rs449074_2	TT	CT	AA	CC	1.399	20.7243	5.30398e-06	0.00175031
G-G all	synergistic	rs2269429_4	rs16901848_1	rs2493134_4	rs4762_1	TT	AA	TT	AA	1.82625	20.4953	5.97782e-06	0.00197268
G-G TNXB & AGT	synergistic	rs12153855_2	rs2239689_1	rs2493134_4	rs4762_1	TT	GA	TT	AA	2.96579	20.3778	6.35631e-06	0.00209758
G-G all	synergistic	rs2021783_4	rs450630_1	rs449074_2	rs11122576_2	CT	GA	TC	TC	1.39175	20.16	7.12275e-06	0.00235051
G-G all	synergistic	rs2021783_4	rs2239689_1	rs450630_1	rs11122576_2	CT	AA	GA	TC	1.44297	20.0979	7.35768e-06	0.00242803
G-G TNXB & ZBED9	synergistic	rs2021783_4	rs2269429_4	rs450630_1	rs449074_2	CT	TT	GA	TC	1.39138	19.9462	7.96521e-06	0.00262852
G-G ZBED9 & AGT	synergistic	rs16901848_1	rs450630_1	rs2004776_4	rs4762_1	GA	AA	CT	GA	1.68266	19.8316	8.45725e-06	0.00279089
G-G all	synergistic	rs2239689_1	rs16901848_1	rs450630_1	rs2004776_4	GA	GA	GA	CT	1.58552	19.322	1.10428e-05	0.00364412
G-G TNXB & ZBED9	synergistic	rs12153855_2	rs2239689_1	rs450630_1	rs449074_2	TT	GA	AA	CC	1.44904	19.0759	1.2562e-05	0.00414546
G-G TNXB & AGT	synergistic	rs12153855_2	rs2021783_4	rs2239689_1	rs4762_1	TT	CT	AA	AA	2.82214	18.9885	1.3151e-05	0.00433983
G-G all	synergistic	rs12153855_2	rs2269429_4	rs450630_1	rs2004776_4	TT	TT	AA	TT	2.1126	18.8284	1.43018e-05	0.0047196
G-G TNXB & AGT	synergistic	rs12153855_2	rs2493134_4	rs2004776_4	rs4762_1	TT	TT	TT	AA	2.13447	18.2959	1.89111e-05	0.00624066
G-G all	synergistic	rs2021783_4	rs450630_1	rs2004776_4	rs11122576_2	CT	AA	CT	TC	1.39009	18.0098	2.19771e-05	0.00725245
G-G all	synergistic	rs12153855_2	rs16901848_1	rs449074_2	rs4762_1	TT	AA	CC	AA	2.34585	17.9257	2.29699e-05	0.00758006
G-G all	synergistic	rs12153855_2	rs2239689_1	rs449074_2	rs4762_1	TT	GA	CC	AA	2.73077	17.5111	2.85637e-05	0.00942604
G-G TNXB & ZBED9	synergistic	rs2021783_4	rs2239689_1	rs2269429_4	rs450630_1	CT	GA	CT	GA	1.41991	17.4494	2.95059e-05	0.00973695
G-G all	synergistic	rs2269429_4	rs16901848_1	rs450630_1	rs2493134_4	TT	GA	AA	TT	2.02574	17.0086	3.721e-05	0.0122793
G-G all	synergistic	rs2239689_1	rs450630_1	rs2004776_4	rs11122576_2	GA	AA	CT	TC	1.52672	16.8347	4.07805e-05	0.0134576
G-G all	synergistic	rs12153855_2	rs2021783_4	rs16901848_1	rs4762_1	TT	CT	AA	AA	2.41491	16.8048	4.14294e-05	0.0136717
G-G all	synergistic	rs12153855_2	rs2239689_1	rs16901848_1	rs4762_1	TT	GA	AA	AA	2.41237	16.7662	4.22808e-05	0.0139527
G-G TNXB & AGT	synergistic	rs12153855_2	rs2021783_4	rs2269429_4	rs4762_1	TT	CT	TT	AA	2.30165	16.4758	4.92746e-05	0.0162606
G-G TNXB & AGT	synergistic	rs12153855_2	rs2239689_1	rs2269429_4	rs4762_1	TT	AA	TT	AA	2.29928	16.4368	5.02998e-05	0.0165989
G-G TNXB & AGT	synergistic	rs12153855_2	rs2269429_4	rs11122576_2	rs4762_1	TT	TT	CC	AA	2.3207	16.3531	5.25697e-05	0.017348
G-G TNXB & AGT	synergistic	rs12153855_2	rs2493134_4	rs11122576_2	rs4762_1	TT	TT	CC	AA	1.95031	16.2139	5.65771e-05	0.0186704
G-G TNXB & AGT	synergistic	rs12153855_2	rs2004776_4	rs11122576_2	rs4762_1	TT	TT	CC	AA	1.93331	15.8427	6.88305e-05	0.0227141
G-G TNXB & ZBED9	synergistic	rs2021783_4	rs16901848_1	rs450630_1	rs449074_2	CT	AA	GA	TC	1.34178	15.5034	8.23553e-05	0.0271772
G-G TNXB & AGT	synergistic	rs12153855_2	rs2021783_4	rs11122576_2	rs4762_1	TT	CT	CC	AA	1.91746	15.4959	8.26832e-05	0.0272854
G-G all	synergistic	rs12153855_2	rs449074_2	rs11122576_2	rs4762_1	TT	TC	CC	AA	1.91535	15.4441	8.49799e-05	0.0280434
G-G all	synergistic	rs2021783_4	rs2239689_1	rs450630_1	rs2493134_4	CT	AA	GA	CT	1.47543	15.4392	8.52033e-05	0.0281171
G-G all	synergistic	rs12153855_2	rs2239689_1	rs450630_1	rs2493134_4	TT	GA	AA	TT	2.00004	15.3679	8.8478e-05	0.0291977
G-G all	synergistic	rs2239689_1	rs450630_1	rs449074_2	rs2493134_4	GA	AA	TC	CT	1.43009	15.2593	9.37146e-05	0.0309258
G-G all	synergistic	rs2269429_4	rs450630_1	rs449074_2	rs11122576_2	TT	AA	CC	CC	1.36458	15.1464	9.94891e-05	0.0328314
G-G all	synergistic	rs2021783_4	rs450630_1	rs2493134_4	rs2004776_4	CT	GA	CT	CT	1.47374	14.9126	0.00011261	0.0371613
G-G all	synergistic	rs2269429_4	rs450630_1	rs2493134_4	rs2004776_4	TT	AA	TT	TT	2.55	14.6754	0.0001277	0.042141
G-G all	synergistic	rs12153855_2	rs450630_1	rs2493134_4	rs2004776_4	TT	AA	TT	TT	1.54144	14.4516	0.000143807	0.0474564

## Sheet: DBP
Interaction	Effect Type	SNP1	SNP2	SNP3	SNP4	Geno 1	Geno 2	Geno 3	Geno 4	Effect size	Wald statsitic	P-value	adj. P-value
G-G all	Antagonistic	rs2239689_1	rs450630_1	rs2493134_4	rs11122576_2	GA	GA	CT	TC	-2.94914	22.8398	1.8151e-06	0.000598984
G-G ZBED9 & AGT	Antagonistic	rs16901848_1	rs450630_1	rs2493134_4	rs4762_1	AA	GA	TT	AA	-1.85416	22.7406	1.91199e-06	0.000630956
G-G all	Antagonistic	rs2239689_1	rs450630_1	rs2493134_4	rs2004776_4	GA	GA	CT	CT	-2.11457	20.7677	5.31796e-06	0.00175493
G-G all	Antagonistic	rs2239689_1	rs16901848_1	rs450630_1	rs2004776_4	AA	AA	AA	TT	-2.46255	19.0909	1.27409e-05	0.00420449
G-G all	Antagonistic	rs2239689_1	rs2269429_4	rs16901848_1	rs2493134_4	AA	TT	AA	TT	-2.32518	19.0601	1.2948e-05	0.00427285
G-G all	Antagonistic	rs2239689_1	rs16901848_1	rs450630_1	rs4762_1	GA	AA	GA	GA	-2.47421	18.8803	1.42214e-05	0.00469307
G-G ZBED9 & AGT	Antagonistic	rs16901848_1	rs450630_1	rs2004776_4	rs11122576_2	AA	GA	TT	CC	-2.20906	18.2518	1.97493e-05	0.00651726
G-G all	Antagonistic	rs2239689_1	rs16901848_1	rs450630_1	rs2493134_4	GA	AA	GA	CT	-2.70281	16.6083	4.67327e-05	0.0154218
G-G ZBED9 & AGT	Antagonistic	rs16901848_1	rs2493134_4	rs2004776_4	rs11122576_2	AA	TT	TT	CC	-1.97359	15.4686	8.5137e-05	0.0280952
G-G all	Antagonistic	rs2021783_4	rs2239689_1	rs16901848_1	rs2493134_4	CT	GA	GA	CT	-3.54018	15.3253	9.1822e-05	0.0303013
G-G all	Synergistic	rs2239689_1	rs450630_1	rs2493134_4		AA	AA	TT	-	1.39659	13.2952	0.000268994	0.044384
G-G ZBED9 & AGT	Synergistic	rs16901848_1	rs450630_1	rs2493134_4	rs2004776_4	GA	AA	CT	CT	1.85222	27.6767	1.49964e-07	4.94882e-05
G-G ZBED9 & AGT	Synergistic	rs16901848_1	rs450630_1	rs2004776_4	rs4762_1	GA	AA	CT	GA	1.66219	20.0481	7.73634e-06	0.00255299
G-G all	Synergistic	rs12153855_2	rs2239689_1	rs450630_1	rs2493134_4	TT	AA	AA	TT	1.64033	19.0052	1.33179e-05	0.00439491
G-G all	Synergistic	rs2239689_1	rs450630_1	rs2004776_4	rs4762_1	GA	AA	CT	GA	3.54192	18.4621	1.76855e-05	0.0058362
G-G all	Synergistic	rs2239689_1	rs450630_1	rs2493134_4	rs4762_1	AA	AA	TT	AA	1.89304	18.2054	2.02259e-05	0.00667453
G-G ZBED9 & AGT	Synergistic	rs16901848_1	rs450630_1	rs2493134_4	rs11122576_2	GA	AA	CT	TC	1.48301	15.3908	8.87038e-05	0.0292723
G-G all	Synergistic	rs12153855_2	rs2239689_1	rs450630_1	rs4762_1	TT	AA	AA	AA	1.6931	15.0298	0.000107283	0.0354034
G-G all	Synergistic	rs2239689_1	rs449074_2	rs2493134_4	rs2004776_4	AA	TC	TT	TT	16.6652	14.7368	0.000125259	0.0413355
G-G all	Synergistic	rs12153855_2	rs2239689_1	rs449074_2	rs4762_1	TT	AA	CC	AA	5.25533	14.5244	0.000140149	0.0462492

## Sheet: SBP
interaction	Effect Type	SNP1	SNP2	SNP3	SNP4	Geno 1	Geno 2	Geno 3	Geno 4	Effect size	Wald statsitic	P-value	adj. P-value
G-G all	Antagonistic	rs2021783_4	rs2239689_1	rs450630_1	rs2493134_4	CT	GA	GA	CT	-5.48852	16.4008	5.21004e-05	0.0171931
G-G ZBED9 & AGT	Antagonistic	rs16901848_1	rs450630_1	rs2004776_4	rs11122576_2	AA	GA	TT	CC	-3.14204	16.273	5.57388e-05	0.0183938
G-G all	Antagonistic	rs12153855_2	rs16901848_1	rs2493134_4	rs4762_1	CT	AA	CT	GA	-3.20453	15.4467	8.61246e-05	0.0284211
G-G all	Antagonistic	rs2239689_1	rs2269429_4	rs450630_1	rs2493134_4	AA	TT	AA	TT	-4.63949	15.4029	8.81118e-05	0.0290769
G-G all	Antagonistic	rs2021783_4	rs16901848_1	rs450630_1	rs2004776_4	CT	AA	GA	CT	-2.76671	15.2332	9.63952e-05	0.0318104
G-G all	Antagonistic	rs12153855_2	rs16901848_1	rs450630_1	rs2493134_4	CT	AA	GA	CT	-3.15939	14.7107	0.000127026	0.0419184
G-G all	Synergistic	rs12153855_2	rs450630_1	rs2004776_4		TT	AA	TT	-	6.49758	15.7033	7.52055e-05	0.0124089
G-G all	Synergistic	rs2239689_1	rs450630_1	rs2004776_4		GA	AA	CT	-	7.76947	13.4607	0.00024634	0.0406461
G-G all	Synergistic	rs12153855_2	rs2239689_1	rs450630_1	rs2004776_4	TT	GA	AA	TT	11.5018	23.3034	1.42788e-06	0.000471201
G-G all	Synergistic	rs2239689_1	rs16901848_1	rs450630_1	rs2004776_4	GA	GA	GA	CT	8.74809	22.9926	1.67818e-06	0.000553799
G-G all	Synergistic	rs2239689_1	rs2269429_4	rs450630_1	rs2004776_4	GA	TT	GA	CT	8.33158	21.5712	3.50335e-06	0.00115611
G-G all	Synergistic	rs2239689_1	rs450630_1	rs2493134_4	rs2004776_4	GA	AA	CT	CT	5.15107	19.8549	8.55133e-06	0.00282194
G-G all	Synergistic	rs12153855_2	rs16901848_1	rs2004776_4	rs4762_1	TT	GA	TT	AA	3.99833	19.6555	9.4917e-06	0.00313226
G-G all	Synergistic	rs12153855_2	rs2269429_4	rs450630_1	rs2004776_4	TT	TT	AA	TT	5.99927	18.8584	1.43785e-05	0.00474491
G-G all	Synergistic	rs12153855_2	rs450630_1	rs2004776_4	rs4762_1	TT	AA	TT	AA	3.78517	18.4723	1.75912e-05	0.0058051
G-G all	Synergistic	rs2239689_1	rs450630_1	rs2004776_4	rs11122576_2	GA	AA	CT	TC	9.49024	18.4023	1.82475e-05	0.00602166
G-G all	Synergistic	rs12153855_2	rs16901848_1	rs450630_1	rs4762_1	TT	GA	AA	AA	3.96099	17.8072	2.49215e-05	0.0082241
G-G ZBED9 & AGT	Synergistic	rs16901848_1	rs450630_1	rs2004776_4	rs4762_1	GA	AA	CT	GA	4.07761	17.7329	2.591e-05	0.00855031
G-G all	Synergistic	rs2239689_1	rs450630_1	rs449074_2	rs2004776_4	GA	AA	TC	CT	8.52046	17.5783	2.8085e-05	0.00926805
G-G all	Synergistic	rs12153855_2	rs16901848_1	rs450630_1	rs2004776_4	TT	GA	AA	TT	5.89642	17.4868	2.9475e-05	0.00972677
G-G all	Synergistic	rs2239689_1	rs450630_1	rs2493134_4	rs4762_1	GA	AA	CT	GA	4.99793	17.303	3.24439e-05	0.0107065
G-G all	Synergistic	rs2269429_4	rs16901848_1	rs450630_1	rs2004776_4	TT	GA	AA	TT	5.03815	17.0852	3.63825e-05	0.0120062
G-G all	Synergistic	rs12153855_2	rs450630_1	rs2493134_4	rs4762_1	TT	AA	TT	AA	4.2311	16.8982	4.01198e-05	0.0132395
G-G all	Synergistic	rs2021783_4	rs2239689_1	rs450630_1	rs2004776_4	CT	AA	GA	CT	8.2893	16.401	5.20937e-05	0.0171909
G-G all	Synergistic	rs2239689_1	rs2269429_4	rs16901848_1	rs11122576_2	GA	TT	GA	TC	5.11528	16.144	5.96511e-05	0.0196849
G-G all	Synergistic	rs2239689_1	rs450630_1	rs449074_2	rs2493134_4	GA	AA	TC	CT	4.62874	16.0905	6.13376e-05	0.0202414
G-G all	Synergistic	rs12153855_2	rs16901848_1	rs2493134_4	rs11122576_2	TT	GA	TT	CC	7.77314	15.8337	7.02369e-05	0.0231782
G-G all	Synergistic	rs12153855_2	rs450630_1	rs2493134_4	rs2004776_4	TT	AA	TT	TT	3.03724	15.5813	8.01978e-05	0.0264653
G-G all	Synergistic	rs12153855_2	rs450630_1	rs449074_2	rs2004776_4	TT	AA	CC	TT	6.4937	15.5627	8.09912e-05	0.0267271
G-G all	Synergistic	rs12153855_2	rs2239689_1	rs449074_2	rs2004776_4	TT	GA	CC	TT	5.94148	15.518	8.29254e-05	0.0273654
G-G ZBED9 & AGT	Synergistic	rs16901848_1	rs450630_1	rs449074_2	rs4762_1	GA	AA	TC	GA	22.8618	15.2979	9.31565e-05	0.0307416
G-G all	Synergistic	rs2269429_4	rs450630_1	rs2004776_4	rs11122576_2	TT	AA	TT	CC	11.3117	15.1821	9.89946e-05	0.0326682
G-G all	Synergistic	rs2239689_1	rs450630_1	rs2004776_4	rs4762_1	GA	AA	CT	GA	3.8409	15.1647	9.991e-05	0.0329703
G-G all	Synergistic	rs12153855_2	rs2021783_4	rs450630_1	rs2004776_4	TT	CT	AA	TT	6.41312	15.0352	0.000106985	0.0353051
G-G all	Synergistic	rs12153855_2	rs2269429_4	rs450630_1	rs4762_1	TT	TT	AA	AA	2.46311	14.844	0.00011835	0.0390554
G-G ZBED9 & AGT	Synergistic	rs16901848_1	rs450630_1	rs2493134_4	rs2004776_4	GA	AA	CT	CT	3.31556	14.7346	0.000125432	0.0413924
